# Supplementary material for: Peroxidase-like oxidative activity of a manganese-coordinated histidyl bolaamphiphile self-assembly
Source: Royal Society of Chemistry journal article supplement (doi:10.1039/c5nr04893a), 2015-01-01
Supplement: c5nr04893a1.pdf [file c5nr04893a1.pdf]

## Electronic Supplementary Information

### Peroxidase-like Oxidative Activity of a Manganese-Coordinated Histidyl Bolaamphiphile Self-Assembly

*Min-Chul Kim and Sang-Yup Lee\**

#### 1. Creation of copper and cobalt oxide clusters upon addition of H<sub>2</sub>O<sub>2</sub>

TEM images of copper and cobalt oxide clusters are shown in Figure S1. Right after the addition of H<sub>2</sub>O<sub>2</sub> to the mixture containing Cu<sup>2+</sup> and Co<sup>2+</sup> ions, solid clusters of copper- and cobalt-oxides were generated. EDX analyses of the metal clusters confirmed the presence of Cu and Co ions.

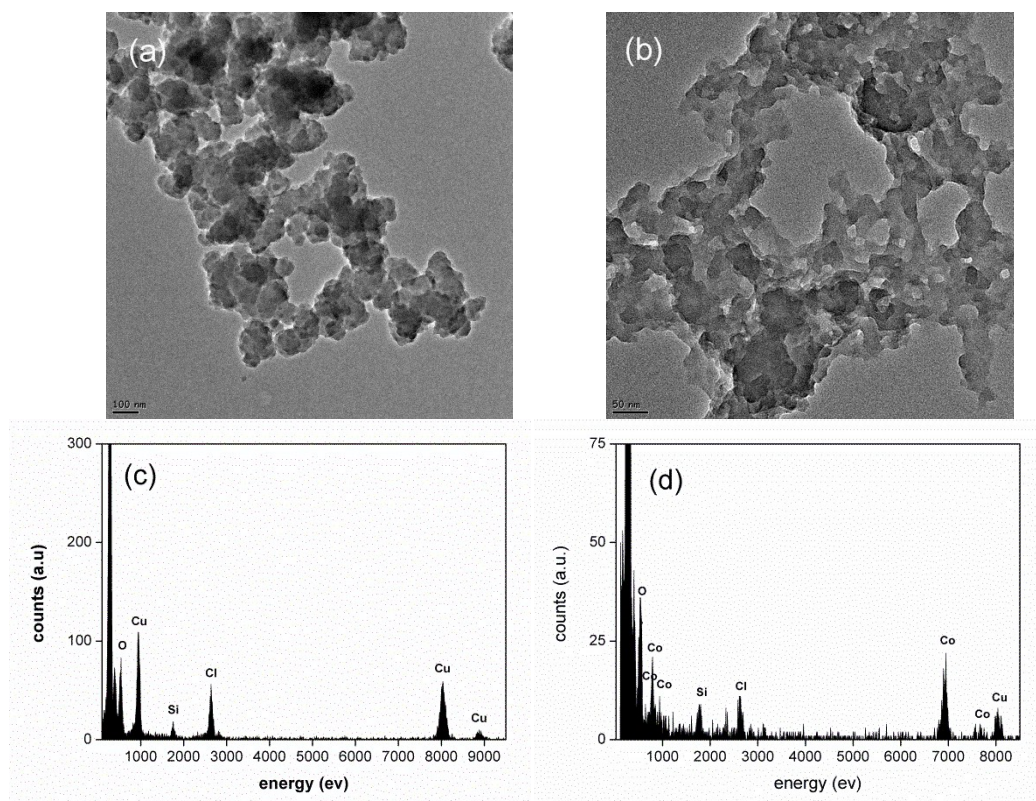

**Figure S1.** Characterization of the solid clusters obtained from the mixtures containing Cu and Co ions. TEM images of (a) copper oxide and (b) cobalt oxide clusters (scale bar: 100 nm and 50 nm, respectively) and corresponding EDX spectra (c: copper oxide, d: cobalt oxide).

## 2. Lineweaver-Burk plots of the catalysts prepared at various $\text{MnCl}_2$ concentrations

To determine the kinetics parameters, Lineweaver-Burk plots of each catalyst were constructed for data wherein the  $\text{H}_2\text{O}_2$  concentration was 40 mM. The reaction rates were determined from the concentrations of 2,3-diaminophenazine produced in the early stages of the catalytic reaction.

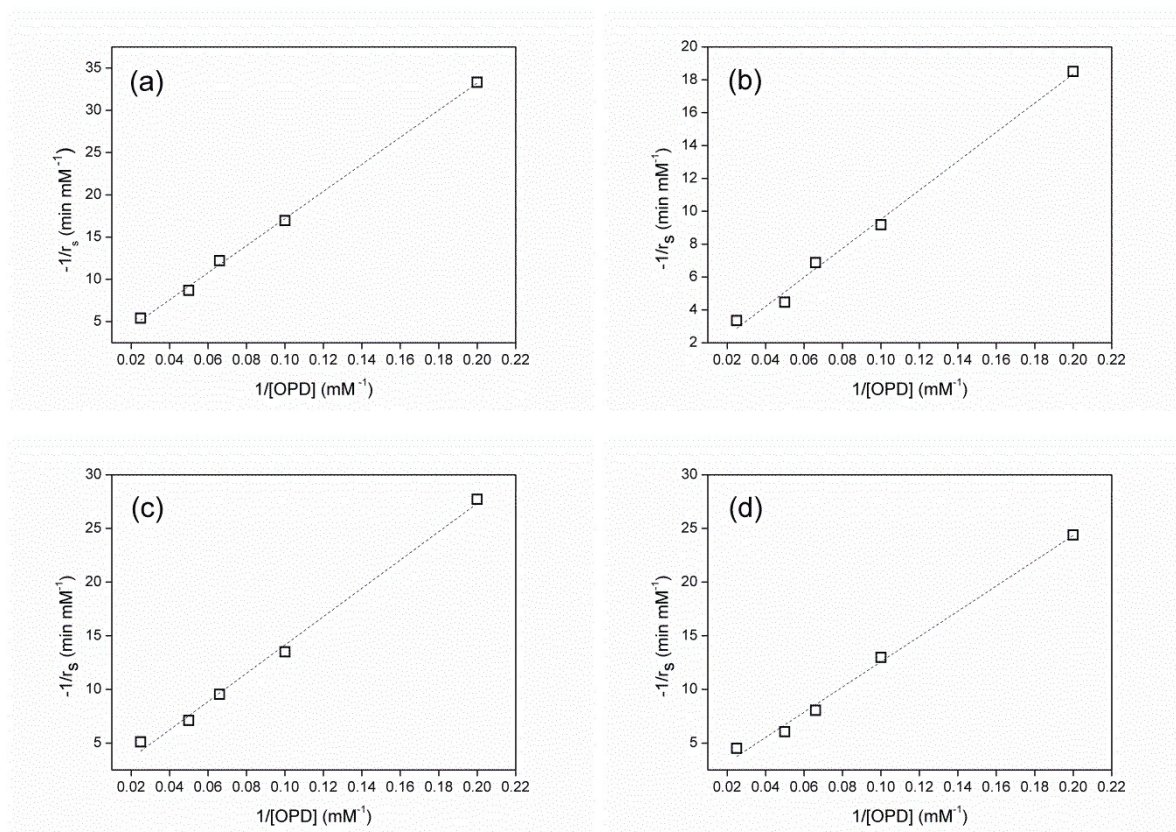

**Figure S2.** Lineweaver-Burk plots of the catalyst prepared with (a) 20 mM, (b) 40 mM, (c) 60 mM and (d) 80 mM  $\text{MnCl}_2$ . The catalytic reaction was performed at pH 7.1 with a  $\text{H}_2\text{O}_2$  concentration of 40 mM.
